# Supplementary material
Source: Springer Nature journal article supplement (https://www.springermedizin.de/resource/supplementary/12931_2014_1516_MOESM2_ESM.pdf/9426366)

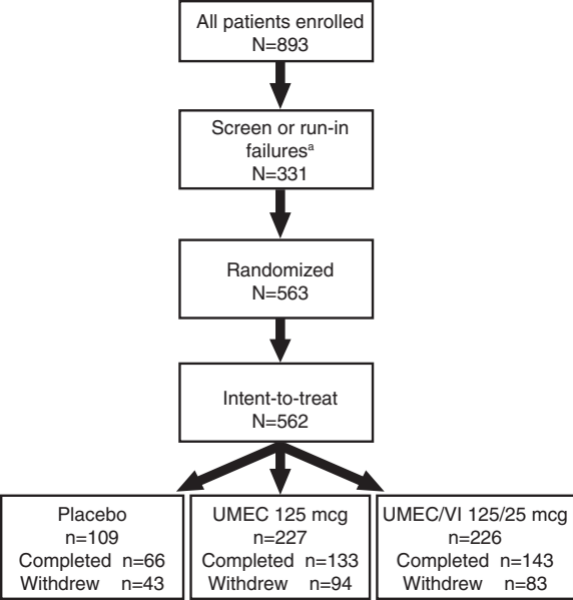

Supplement: MOESM2 [file 9426366]
